# Supplementary material
Source: publisher figshare collection journal article supplement (https://geolsoc.figshare.com/ndownloader/files/5422577)
Supplement: Supplementary file 1 [file 5422577]

Appendix 3. 40Ar/39Ar age data from individual hornblendes from core V28-82
Sample	Ca/K	% 40Ar*	Age	�		Run_ID#	Run_Date	40Ar#	40Ar (err)	39Ar#	39Ar (err)	38Ar#	38Ar (err)	37Ar#	37Ar (err)	36Ar#	36Ar (err)
117-118	44.1	8.9	47	30		L0516-02	25/07/1999	0.0291	0.0001	0.000119	0.000005	0.000014	0.000003	0.001210	0.000010	0.000093	0.000004
119-120	16.7	78.0	53	4		L0515-02	25/07/1999	0.0196	0.0001	0.000688	0.000006	0.000013	0.000003	0.002442	0.000014	0.000014	0.000004
119-120	9.1	98.5	874	10		L0515-03	25/07/1999	0.2497	0.0003	0.000522	0.000009	0.000001	0.000003	0.000960	0.000012	0.000013	0.000004
122-123	10.8	99.6	1744	11		L0518-01A	24/07/1999	1.5653	0.0009	0.001245	0.000007	0.000006	0.000004	0.002865	0.000020	0.000039	0.000005
125-125.5	10.4	101.1	648	63		lost
125-125.5	7.9	99.4	960	8		L0514-01	25/07/1999	0.4164	0.0003	0.000770	0.000005	0.000014	0.000002	0.001293	0.000014	0.000010	0.000003
125-125.5	8.0	96.5	1029	7		lost
125-125.5	6.8	98.6	1618	11		L0514-03	25/07/1999	0.9538	0.0009	0.000836	0.000012	0.000024	0.000003	0.001219	0.000015	0.000042	0.000006
125-125.5	7.0	99.6	1939	13		L0514-05	25/07/1999	1.1611	0.0008	0.000797	0.000010	0.000019	0.000002	0.001167	0.000011	0.000011	0.000004
125-126	9.0	100.7	915	10		L0513-06	25/07/1999	0.2078	0.0002	0.000417	0.000008	0.000004	0.000002	0.000791	0.000010	-0.000014	0.000004
125-126	4.8	99.6	936	9		L0513-05	25/07/1999	0.3020	0.0004	0.000585	0.000008	0.000005	0.000002	0.000570	0.000009	0.000002	0.000004
125-126	8.1	100.6	922	11		L0513-03	25/07/1999	0.2066	0.0002	0.000396	0.000009	0.000002	0.000002	0.000690	0.000009	-0.000004	0.000003
125-126	17.8	99.3	961	11		L0513-07	25/07/1999	0.2491	0.0003	0.000463	0.000005	0.000012	0.000002	0.001700	0.000020	0.000010	0.000005
125-126	9.4	100.9	973	11		L0513-01	25/07/1999	0.2006	0.0002	0.000362	0.000008	0.000005	0.000002	0.000724	0.000010	-0.000005	0.000003
125-126	8.4	99.5	1075	7		L0513-08	25/07/1999	2.4160	0.0022	0.003874	0.000018	0.000139	0.000006	0.006768	0.000027	0.000037	0.000004
125-126	10.0	100.1	1100	10		L0513-02	25/07/1999	0.3954	0.0005	0.000616	0.000011	0.000039	0.000002	0.001311	0.000014	0.000000	0.000003
125-126	7.0	99.8	1642	12		L0513-04	25/07/1999	0.7070	0.0005	0.000615	0.000010	0.000009	0.000004	0.000922	0.000014	0.000007	0.000004
127-128	7.6	98.9	1558	9		L0512-01	25/07/1999	2.9106	0.0016	0.002736	0.000019	0.000070	0.000004	0.004344	0.000024	0.000098	0.000006
127-128	10.8	99.6	2841	25		L0512-02	25/07/1999	0.9247	0.0005	0.000308	0.000007	0.000013	0.000004	0.000716	0.000013	0.000018	0.000005
128-128.5	7.8	99.6	1649	15		L0511-03	25/07/1999	0.5492	0.0005	0.000466	0.000009	0.000010	0.000004	0.000785	0.000012	0.000000	0.000005
128-128.5	5.2	99.4	1659	18		L0511-01	25/07/1999	0.4364	0.0004	0.000367	0.000009	0.000026	0.000006	0.000401	0.000010	0.000008	0.000006
128-128.5	11.3	99.1	1708	16		L0511-02	25/07/1999	0.5240	0.0005	0.000429	0.000008	0.000014	0.000004	0.001070	0.000012	0.000022	0.000004
128-128.5	32.5	99.9	2320	4		lost
128-128.5	5.5	100.1	2446	7		lost
128-128.5	7.5	99.8	2477	21		L0511-04	25/07/1999	0.8143	0.0006	0.000370	0.000007	0.000010	0.000004	0.000580	0.000009	0.000002	0.000005
128-128.5	6.0	100.0	2534	11		lost
128-128.5	6.7	99.8	2580	5		lost
128-128.5	10.4	100.5	2627	16		lost
128-128.5	6.7	99.9	2671	6		lost
128-128.5	7.0	100.0	2682	6		lost
128-128.5	8.6	97.6	2686	15		lost
128-128.5	11.2	100.0	2915	4		lost
130-131	9.0	89.8	419	7		L0510-06	25/07/1999	0.1062	0.0003	0.000480	0.000009	0.000022	0.000005	0.000904	0.000013	0.000039	0.000005
130-131	8.0	99.5	598	6		L0510-01	25/07/1999	0.2903	0.0005	0.000986	0.000013	0.000022	0.000004	0.001651	0.000015	0.000009	0.000005
130-131	6.4	98.4	744	6		L0510-04	25/07/1999	0.5294	0.0004	0.001316	0.000006	0.000035	0.000005	0.001814	0.000012	0.000023	0.000005
130-131	14.1	99.7	1697	19		L0510-05	25/07/1999	0.4073	0.0004	0.000331	0.000008	0.000005	0.000005	0.001011	0.000013	0.000002	0.000004
130-131	13.7	99.6	2688	16		L0510-03	25/07/1999	1.9286	0.0009	0.000736	0.000010	0.000024	0.000005	0.002103	0.000016	0.000027	0.000005
131-131.5	21.8	98.4	1839	44		L0509-01	25/07/1999	0.1740	0.0003	0.000146	0.000010	-0.000001	0.000002	0.000592	0.000017	0.000010	0.000003
131-131.5	9.8	99.4	1788	11		L0509-02	25/07/1999	1.1387	0.0008	0.000898	0.000008	0.000020	0.000002	0.001489	0.000013	0.000008	0.000005
131-131.5	6.9	99.8	1825	9		L0509-06	25/07/1999	15.4341	0.0130	0.011530	0.000019	0.000320	0.000009	0.016779	0.000051	0.000077	0.000008
131-131.5	7.8	99.8	1772	11		L0509-07	25/07/1999	1.5258	0.0019	0.001126	0.000013	0.000021	0.000003	0.002404	0.000017	0.000027	0.000005
131-131.5	6.4	99.7	1903	15		L0509-05	25/07/1999	0.9471	0.0004	0.000656	0.000010	0.000024	0.000003	0.000910	0.000010	0.000009	0.000005
131-131.5	5.6	99.8	2569	11		L0509-04	25/07/1999	28.2751	0.0430	0.011707	0.000045	0.000211	0.000011	0.013892	0.000052	0.000180	0.000010
131-131.5	9.2	99.5	2770	18		L0509-03	25/07/1999	1.2846	0.0005	0.000469	0.000008	0.000008	0.000002	0.000907	0.000010	0.000027	0.000004
133-134	14.2	122.5	20	11		lost
133-134	0.4	92.9	749	67		lost
133-134	50.9	96.4	1652	13		L0508-05	24/07/1999	0.6568	0.0005	0.000556	0.000008	0.000018	0.000003	0.006145	0.000027	0.000085	0.000003
133-134	6.6	99.7	1745	10		L0508-07	24/07/1999	1.7895	0.0011	0.001444	0.000014	0.000027	0.000004	0.001977	0.000016	0.000020	0.000004
133-134	10.2	99.1	1713	18		L0508-09	25/07/1999	0.3394	0.0002	0.000271	0.000006	0.000003	0.000002	0.000580	0.000008	0.000006	0.000004
133-134	7.5	99.2	1752	13		L0508-04	24/07/1999	0.6923	0.0007	0.000547	0.000004	0.000013	0.000002	0.000893	0.000008	0.000021	0.000004
133-134	6.9	99.8	1805	15		L0508-06	24/07/1999	0.8287	0.0004	0.000622	0.000009	0.000014	0.000005	0.001126	0.000009	0.000020	0.000005
133-134	8.8	99.7	1837	13		lost
133-134	10.4	98.3	2396	22		L0508-08	24/07/1999	0.6468	0.0005	0.000307	0.000009	-0.000006	0.000003	0.000649	0.000010	0.000039	0.000003
133-134	16.6	99.6	2453	19		L0508-03	24/07/1999	0.7780	0.0010	0.000343	0.000008	0.000000	0.000002	0.001229	0.000013	0.000005	0.000005
134-135	14.3	103.7	5	3		lost
134-135	14.2	59.5	18	6		L0502-17	17/07/1999	0.0034	0.0001	0.000390	0.000007	0.000011	0.000003	0.001405	0.000009	0.000000	0.000004
134-135	14.0	100.5	446	7		L0502-04A	22/07/1999	0.0581	0.0003	0.000282	0.000006	0.000001	0.000003	0.000832	0.000006	0.000006	0.000003
134-135	10.2	99.9	466	6		L0502-05A	22/07/1999	0.1032	0.0003	0.000419	0.000004	0.000003	0.000002	0.000976	0.000010	-0.000005	0.000003
134-135	20.2	96.3	890	9		L0502-14	17/07/1999	0.3657	0.0003	0.000714	0.000011	0.000020	0.000005	0.003692	0.000024	0.000055	0.000006
134-135	29.8	93.3	1415	32		L0502-02	16/07/1999	0.1309	0.0002	0.000121	0.000006	0.000004	0.000002	0.000979	0.000012	0.000035	0.000006
134-135	25.1	93.5	1595	43		L0502-03A	22/07/1999	0.2055	0.0002	0.000177	0.000006	0.000006	0.000002	0.001074	0.000009	0.000008	0.000001
134-135	27.7	99.4	1673	21		L0502-07	16/07/1999	0.1695	0.0002	0.000114	0.000008	0.000007	0.000003	0.000928	0.000013	0.000038	0.000004
134-135	27.3	98.9	1675	22		L0502-18A	22/07/1999	0.4230	0.0003	0.000344	0.000007	0.000013	0.000002	0.001918	0.000013	0.000060	0.000002
134-135	9.8	102.3	1802	12		L0502-06	16/07/1999	1.2717	0.0012	0.001009	0.000012	0.000019	0.000005	0.002302	0.000014	0.000014	0.000006
134-135	10.2	100.0	1694	14		L0502-01	16/07/1999	0.5803	0.0015	0.000459	0.000009	0.000016	0.000004	0.000835	0.000011	0.000014	0.000005
134-135	25.5	95.9	1698	16		L0502-08	16/07/1999	0.4091	0.0005	0.000337	0.000011	0.000003	0.000003	0.002395	0.000015	0.000009	0.000004
134-135	5.4	99.6	1723	17		L0502-20A	22/07/1999	0.5844	0.0026	0.000501	0.000008	0.000011	0.000003	0.000559	0.000005	0.000012	0.000003
134-135	6.2	99.5	2045	11		L0502-15A	22/07/1999	0.8855	0.0005	0.000714	0.000005	0.000015	0.000003	0.000989	0.000013	0.000017	0.000003
134-135	7.5	99.5	1734	15		L0502-24A	24/07/1999	0.4960	0.0005	0.000428	0.000008	0.000005	0.000003	0.000932	0.000010	0.000003	0.000003
134-135	9.0	99.7	1745	12		L0502-22A	23/07/1999	0.9445	0.0008	0.000727	0.000009	-0.000007	0.000003	0.001547	0.000013	-0.000076	0.000003
134-135	6.6	99.6	1737	12		L0502-23A	23/07/1999	1.0909	0.0009	0.000728	0.000005	-0.000003	0.000003	0.001158	0.000010	-0.000060	0.000004
134-135	7.1	101.6	1962	12		L0502-16A	22/07/1999	2.7254	0.0017	0.001677	0.000012	0.000074	0.000004	0.002354	0.000013	0.000038	0.000005
136-137	5.0	99.1	1625	11		L0500-05	24/07/1999	1.2506	0.0005	0.001108	0.000006	0.000034	0.000003	0.001202	0.000012	0.000046	0.000006
136-137	6.8	99.6	1726	12		L0500-03	24/07/1999	0.8796	0.0004	0.000726	0.000010	0.000005	0.000003	0.001052	0.000013	0.000016	0.000004
136-137	9.4	99.2	1745	11		L0500-08	24/07/1999	1.0119	0.0005	0.000798	0.000010	0.000022	0.000005	0.001645	0.000015	0.000037	0.000005
136-137	7.1	98.7	1790	11		L0500-06	24/07/1999	1.3157	0.0007	0.001006	0.000006	0.000053	0.000003	0.001499	0.000017	0.000046	0.000005
136-137	6.1	99.7	1869	10		L0500-04	24/07/1999	2.0852	0.0008	0.001492	0.000006	0.000020	0.000003	0.001913	0.000014	0.000017	0.000004
136-137	7.4	99.7	2555	13		L0500-02	24/07/1999	2.7136	0.0010	0.001141	0.000010	0.000020	0.000005	0.001798	0.000014	0.000019	0.000005
138-139	8.7	83.9	221	52		lost
138-139	13.2	98.9	406	8		L0507-08	24/07/1999	0.0603	0.0002	0.000334	0.000008	0.000001	0.000003	0.000904	0.000011	0.000003	0.000004
138-139	5.5	91.6	440	5		L0507-07	24/07/1999	0.1848	0.0002	0.000782	0.000013	0.000012	0.000003	0.000908	0.000012	0.000054	0.000003
138-139	8.0	99.4	906	6		lost
138-139	7.0	99.1	1744	14		L0507-02	24/07/1999	0.5425	0.0004	0.000432	0.000007	0.000008	0.000003	0.000649	0.000011	0.000024	0.000004
138-139	32.7	100.1	1749	26		L0507-04	24/07/1999	0.2425	0.0023	0.000214	0.000007	-0.000008	0.000003	0.001278	0.000021	-0.000006	0.000004
138-139	19.6	98.7	1799	26		L0507-03	24/07/1999	0.2156	0.0002	0.000170	0.000006	-0.000008	0.000004	0.000682	0.000009	0.000010	0.000003
138-139	11.4	99.5	2636	17		L0507-05	24/07/1999	1.1600	0.0010	0.000463	0.000008	0.000009	0.000004	0.001136	0.000010	0.000031	0.000004
139-140	8.4	81.3	457	7		L0506-05A	24/07/1999	0.1084	0.0001	0.000398	0.000008	0.000024	0.000002	0.000727	0.000010	0.000069	0.000002
139-140	16.1	98.5	1687	20		L0506-03	17/07/1999	0.4312	0.0004	0.000347	0.000008	0.000021	0.000003	0.001446	0.000013	0.000024	0.000005
139-140	5.9	99.4	1764	9		L0506-04A	24/07/1999	3.5467	0.0019	0.002758	0.000007	0.000066	0.000005	0.003474	0.000018	0.000089	0.000005
139-140	34.4	98.2	1855	22		L0506-02	17/07/1999	0.4853	0.0004	0.000330	0.000009	0.000012	0.000004	0.002988	0.000018	0.000025	0.000005
139-140	46.7	99.4	2759	46		lost
142-142.5	0.0	98.1	1646	10		L0505-01	16/07/1999	0.4276	0.0004	0.000376	0.000008	0.000013	0.000003	0.001677	0.000016	0.000027	0.000007
142-142.5	9.3	99.8	1727	9		L0505-02	16/07/1999	7.3790	0.0056	0.006048	0.000027	0.000161	0.000007	0.013889	0.000044	0.000390	0.000010
143-144	23.0	99.6	405	4		L0504-03A	24/07/1999	0.2289	0.0002	0.001236	0.000015	0.000014	0.000004	0.005809	0.000034	-0.000005	0.000005
143-144	20.1	90.8	457	4		L0504-02	17/07/1999	0.2812	0.0003	0.001170	0.000010	0.000039	0.000003	0.005761	0.000034	0.000092	0.000006
144-144.5	7.7	99.7	1717	10		L0503-02A	24/07/1999	1.2132	0.0004	0.000995	0.000005	0.000022	0.000002	0.001635	0.000011	0.000009	0.000003
144-144.5	9.3	99.6	1738	12		L0503-03	17/07/1999	0.7064	0.0008	0.000560	0.000007	0.000004	0.000002	0.001318	0.000013	0.000000	0.000004
144-144.5	8.4	98.8	1818	12		L0503-01	17/07/1999	1.0500	0.0005	0.000801	0.000008	0.000017	0.000004	0.001592	0.000012	0.000040	0.000005
Ca/K is calculated from 37Ar/39Ar (with production ratios provided in Renne et al., 1998).
%40Ar* is the % of 40Ar that is not of atmospheric composition, estimated from the 36Ar and atmospheric composition.
lost isotopic data were collected at Princeton during the interval where analyses for Gwiazda et al. (1996, J. Glaciology) and Hemming et al. (2000, CJES) were collected
# signals are reported in nanoamps. 1 nanoamp is approximately 4e-14 moles.
